# Supplementary material
Source: Springer Nature journal article supplement (https://www.springermedizin.de/resource/supplementary/12885_2011_3196_MOESM2_ESM.pdf/9462818)

# V40

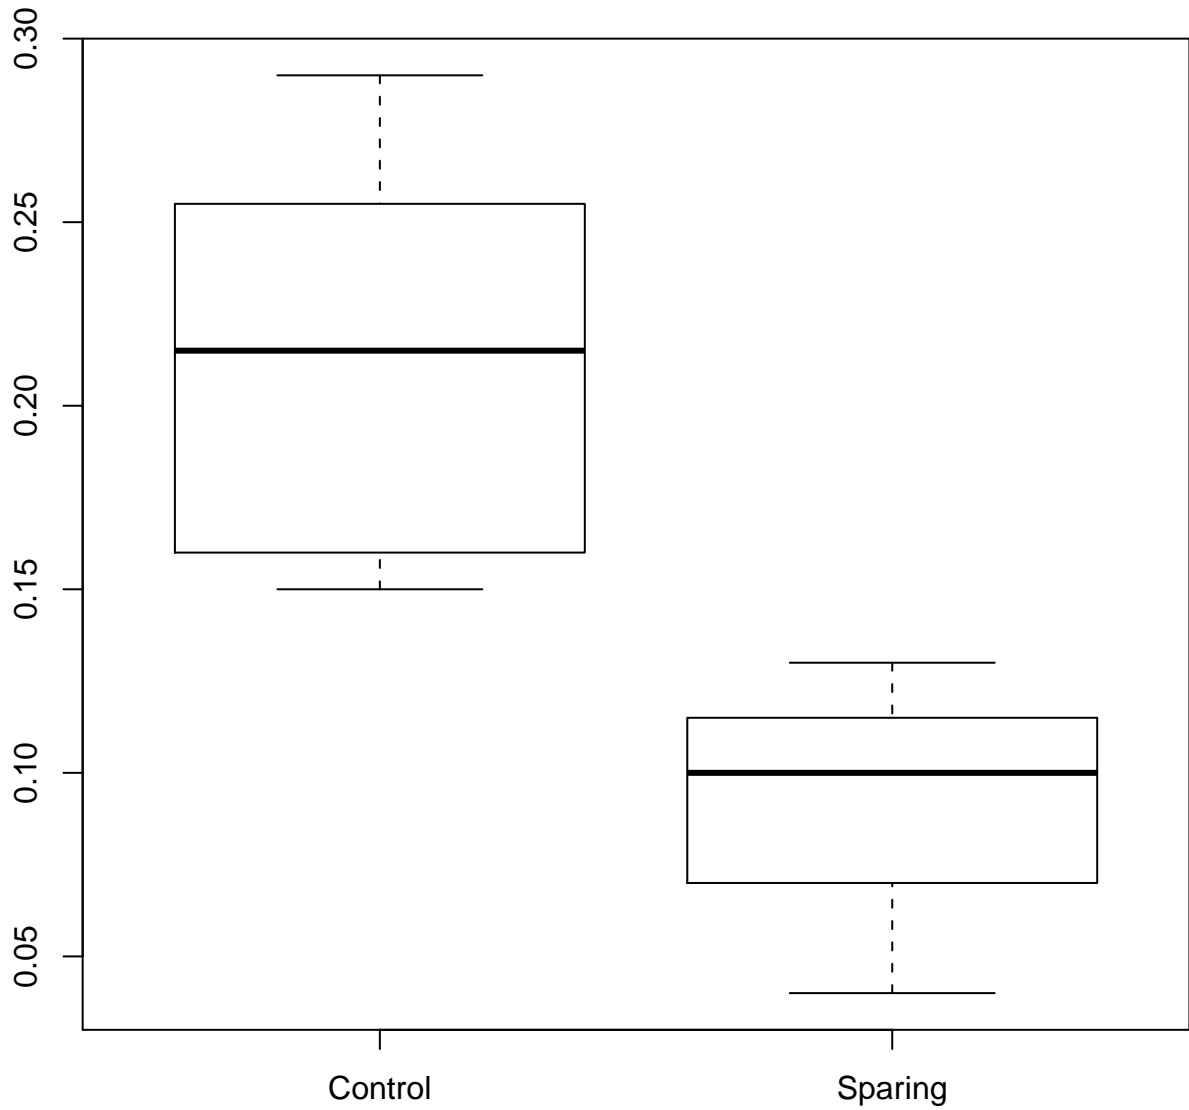

Supplement: MOESM2 [file 9462818]
